# Supplementary material for: Mixing state and particle hygroscopicity of organic-dominated aerosols over the Pearl River Delta region in China
Source: Copernicus journal article supplement (doi:10.5194/acp-18-14079-2018), 2018-10-04
Supplement: Supplementary file 1 [file acp-18-14079-2018-supplement.pdf]

Supplement of Atmos. Chem. Phys., 18, 14079–14094, 2018  
<https://doi.org/10.5194/acp-18-14079-2018-supplement>  
© Author(s) 2018. This work is distributed under  
the Creative Commons Attribution 4.0 License.

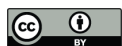

*Supplement of*

## **Mixing state and particle hygroscopicity of organic-dominated aerosols over the Pearl River Delta region in China**

**Juan Hong et al.**

*Correspondence to:* Haobo Tan ([hbtan@grmc.gov.cn](mailto:hbtan@grmc.gov.cn)) and Lin Wang ([lin\\_wang@fudan.edu.cn](mailto:lin_wang@fudan.edu.cn))

The copyright of individual parts of the supplement might differ from the CC BY 4.0 License.

Supplement:

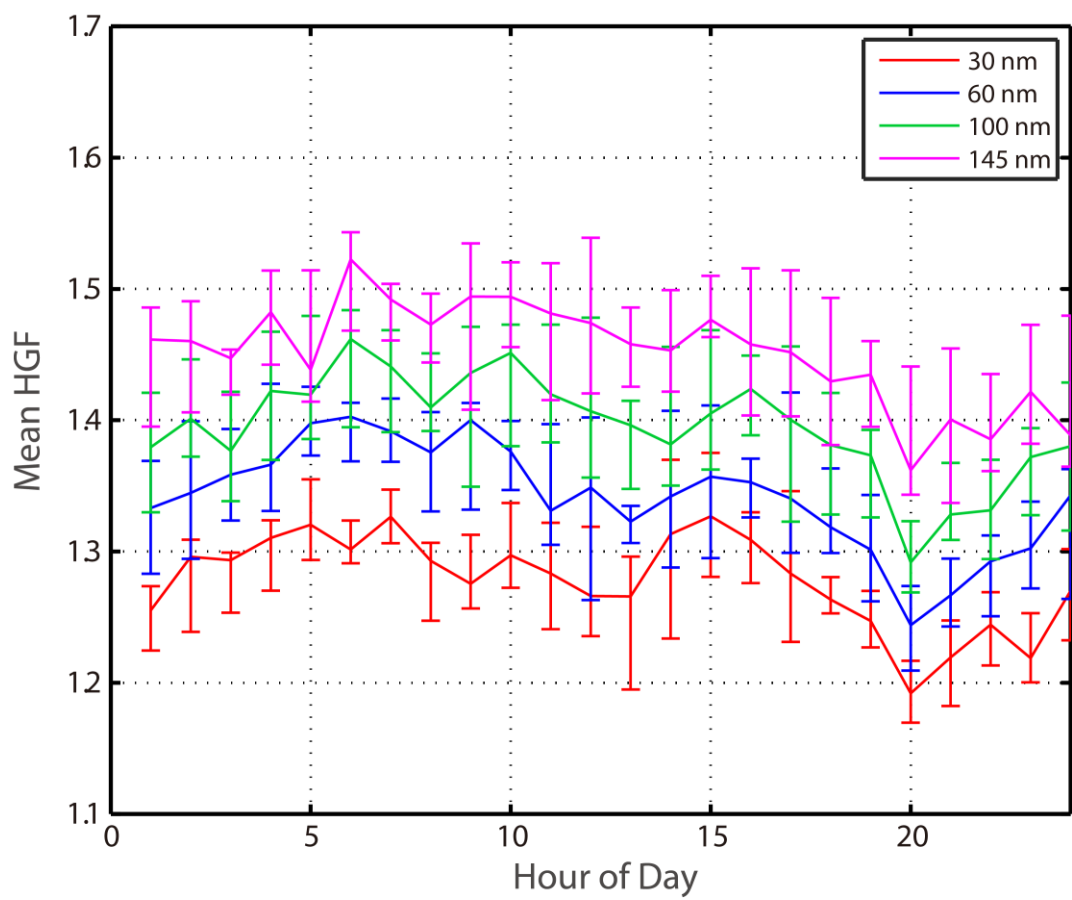

Figure S1. Diurnal variation of the mean hygroscopic growth factor of 30, 60, 100 and 145 nm particles during this study.

5

10

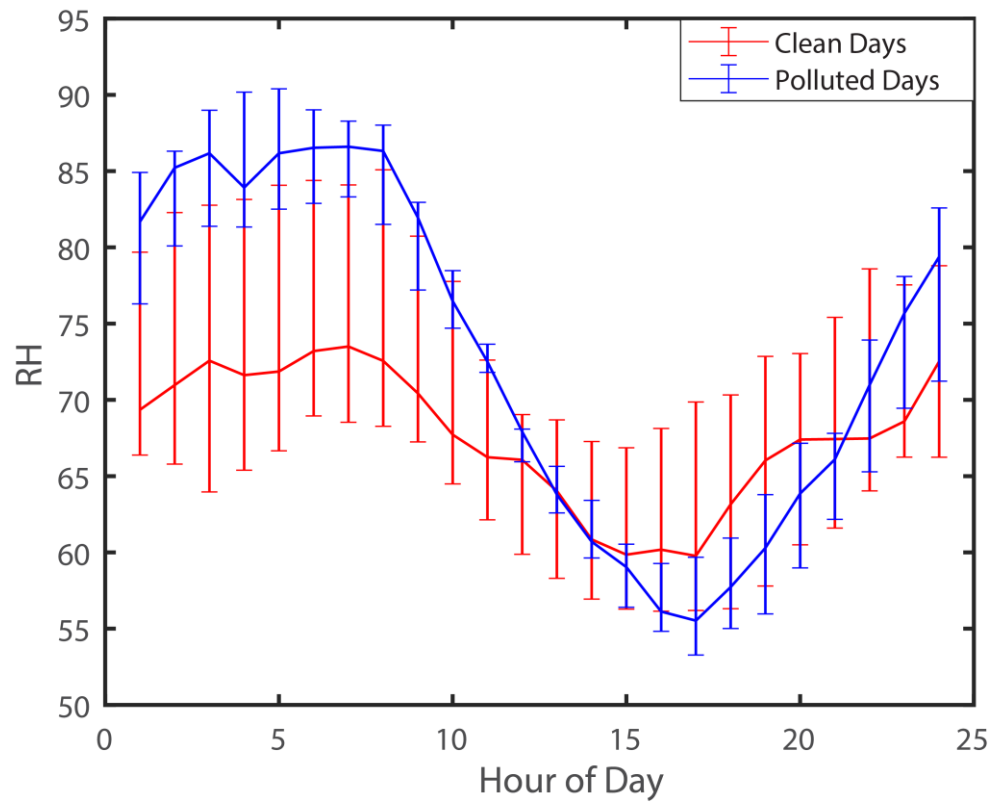

Figure S2. Diurnal variation of relative humidity during the polluted and clean days.

15

20

25

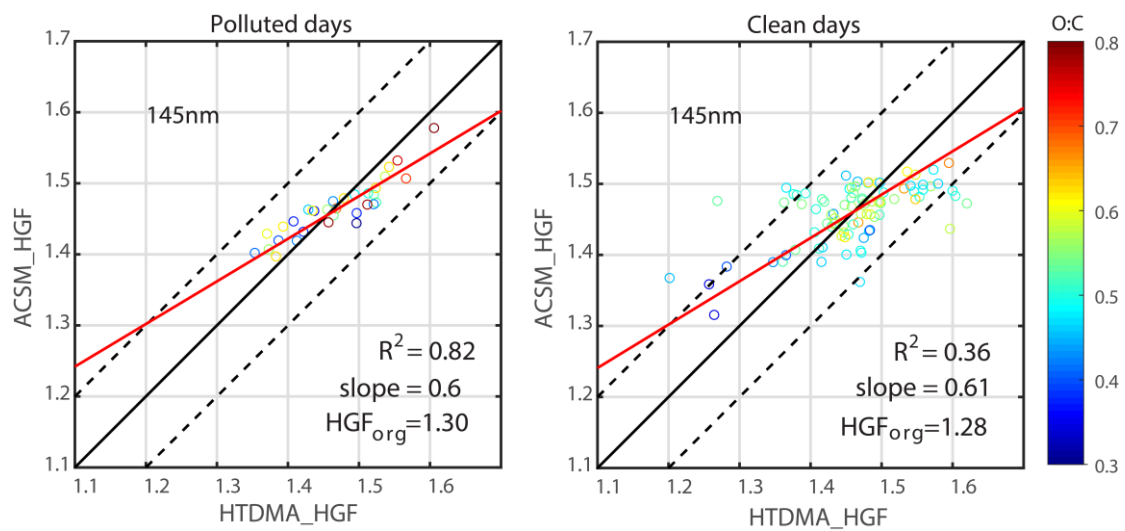

Figure S3. Closure analysis with the best fitting between the measured HGFs and the ACSM-derived ones using constant  $HGF_{org}$  for 145 nm particles during the polluted and clean days, respectively.
